# Supplementary material for: Dose-Dependent Effect of Smoking on Risk of Diabetes Remains after Smoking Cessation: A Nationwide Population-Based Cohort Study in Korea
Source: PubMed Central journal article supplement — Diabetes Metab J. 2021 Mar 4;45(4):539–46. doi: 10.4093/dmj.2020.0061 (PMC8369207; doi:10.4093/dmj.2020.0061), 2021-03-04
Supplement: dmj-2020-0061-suppl1.pdf [file dmj-2020-0061-suppl1.pdf]

**Supplementary Table 1.** Risk of diabetes according to intensity of smoking in packs per day

| Smoking amount         | No. of subjects | Diabetes | HR (95% CI)         |                     |                     |
|------------------------|-----------------|----------|---------------------|---------------------|---------------------|
|                        |                 |          | Model 1             | Model 2             | Model 3             |
| Nonsmokers             | 3,734,732       | 114,250  | 0.787 (0.753–0.823) | 0.814 (0.779–0.852) | 0.807 (0.772–0.844) |
| <b>Quitters</b>        |                 |          |                     |                     |                     |
| Light smoker           | 35,314          | 705      | 0.918 (0.842–0.999) | 0.9 (0.826–0.98)    | 0.913 (0.838–0.994) |
| Medium smoker          | 90,036          | 2,091    | 1.012 (0.952–1.076) | 0.942 (0.887–1.002) | 0.958 (0.901–1.018) |
| Heavy smokers          | 76,669          | 2,821    | 1.194 (1.128–1.264) | 1.091 (1.03–1.154)  | 1.119 (1.057–1.185) |
| Extreme smokers        | 50,642          | 3,209    | 1.376 (1.301–1.454) | 1.295 (1.225–1.37)  | 1.348 (1.275–1.425) |
| <b>Current smokers</b> |                 |          |                     |                     |                     |
| Light smoker           | 100,463         | 2,050    | 1 (reference)       | 1 (reference)       | 1 (reference)       |
| Medium smoker          | 455,872         | 9,718    | 1.073 (1.023–1.126) | 1.062 (1.013–1.114) | 1.059 (1.010–1.111) |
| Heavy smokers          | 427,226         | 15,445   | 1.303 (1.245–1.365) | 1.35 (1.289–1.414)  | 1.333 (1.273–1.396) |
| Extreme smokers        | 227,838         | 14,046   | 1.464 (1.397–1.534) | 1.619 (1.545–1.697) | 1.6 (1.527–1.677)   |

Model 1: adjusted for age and sex; Model 2: adjusted for age, sex, alcohol drinking (heavy), income (low), exercise (regular), body mass index, hypertension, and dyslipidemia; Model 3: adjusted for age, sex, alcohol drinking (heavy), income (low), exercise (regular), body mass index, hypertension, dyslipidemia, and weight change.

HR, hazard ratio; CI, confidence interval.
