# Supplementary material for: Dose-Dependent Effect of Smoking on Risk of Diabetes Remains after Smoking Cessation: A Nationwide Population-Based Cohort Study in Korea
Source: PubMed Central journal article supplement — Diabetes Metab J. 2021 Mar 4;45(4):539–46. doi: 10.4093/dmj.2020.0061 (PMC8369207; doi:10.4093/dmj.2020.0061), 2021-03-04
Supplement: dmj-2020-0061-suppl2.pdf [file dmj-2020-0061-suppl2.pdf]

**Supplementary Table 2.** Smoking status and risk of diabetes by subgroup

| Subgroup         | Smoking status  | No. of subjects | Diabetes | HR (95% CI)         | P interaction |         |
|------------------|-----------------|-----------------|----------|---------------------|---------------|---------|
| Sex              |                 |                 |          |                     | 0.4831        |         |
| Male             | Nonsmokers      | 971,103         | 27,806   | 0.593 (0.584–0.603) |               |         |
|                  | Quitters        | 245,020         | 8,578    | 0.849 (0.829–0.869) |               |         |
|                  | Current smokers | 1,179,838       | 39,831   | 1 (reference)       |               |         |
| Female           | Nonsmokers      | 2,763,629       | 86,444   | 0.599 (0.569–0.632) |               |         |
|                  | Quitters        | 7,641           | 248      | 0.839 (0.733–0.96)  |               |         |
|                  | Current smokers | 31,561          | 1,428    | 1 (reference)       |               |         |
| Age group, yr    |                 |                 |          |                     |               | <0.0001 |
| 20–39            | Nonsmokers      | 856,729         | 5,401    | 0.724 (0.694–0.756) |               |         |
|                  | Quitters        | 85,642          | 1,071    | 0.806 (0.756–0.86)  |               |         |
|                  | Current smokers | 505,637         | 7,596    | 1 (reference)       |               |         |
| 40–64            | Nonsmokers      | 2,261,763       | 68,691   | 0.582 (0.571–0.594) |               |         |
|                  | Quitters        | 144,964         | 6,112    | 0.832 (0.81–0.856)  |               |         |
|                  | Current smokers | 626,837         | 27,717   | 1 (reference)       |               |         |
| ≥65              | Nonsmokers      | 616,240         | 40,158   | 0.671 (0.65–0.693)  |               |         |
|                  | Quitters        | 22,055          | 1,643    | 0.902 (0.854–0.952) |               |         |
|                  | Current smokers | 78,925          | 5,946    | 1 (reference)       |               |         |
| Hypertension     |                 |                 |          |                     | <0.0001       |         |
| No               | Nonsmokers      | 2,794,898       | 54,736   | 0.607 (0.595–0.62)  |               |         |
|                  | Quitters        | 188,244         | 47,09    | 0.862 (0.835–0.889) |               |         |
|                  | Current smokers | 964,611         | 24,465   | 1 (reference)       |               |         |
| Yes              | Nonsmokers      | 939,834         | 59,514   | 0.646 (0.632–0.661) |               |         |
|                  | Quitters        | 64,417          | 4,117    | 0.851 (0.823–0.881) |               |         |
|                  | Current smokers | 246,788         | 16,794   | 1 (reference)       |               |         |
| Dyslipidemia     |                 |                 |          |                     |               | 0.007   |
| No               | Nonsmokers      | 3,011,727       | 69,689   | 0.606 (0.595–0.617) |               |         |
|                  | Quitters        | 203,614         | 5,750    | 0.856 (0.832–0.881) |               |         |
|                  | Current smokers | 1,028,067       | 29,178   | 1 (reference)       |               |         |
| Yes              | Nonsmokers      | 723,005         | 44,561   | 0.638 (0.621–0.657) |               |         |
|                  | Quitters        | 49,047          | 3,076    | 0.866 (0.832–0.901) |               |         |
|                  | Current smokers | 183,332         | 12,081   | 1 (reference)       |               |         |
| Regular exercise |                 |                 |          |                     | 0.003         |         |
| No               | Nonsmokers      | 3,038,942       | 91,887   | 0.621 (0.61–0.632)  |               |         |
|                  | Quitters        | 189,601         | 6,604    | 0.873 (0.85–0.897)  |               |         |
|                  | Current smokers | 998,837         | 33,448   | 1 (reference)       |               |         |
| Yes              | Nonsmokers      | 695,790         | 22,363   | 0.598 (0.578–0.618) |               |         |
|                  | Quitters        | 63,060          | 2,222    | 0.816 (0.778–0.856) |               |         |
|                  | Current smokers | 212,562         | 7,811    | 1 (reference)       |               |         |

(Continued to the next page)

Supplementary Table 2. Continued

| Subgroup      | Smoking status  | No. of subjects | Diabetes | HR (95% CI)         | <i>P</i> interaction |
|---------------|-----------------|-----------------|----------|---------------------|----------------------|
| Weight change |                 |                 |          |                     | <0.0001              |
| < -5%         | Nonsmokers      | 516,553         | 16,298   | 0.603 (0.578–0.629) |                      |
|               | Quitters        | 19,045          | 692      | 0.843 (0.779–0.913) |                      |
|               | Current smokers | 132,657         | 5,140    | 1 (reference)       |                      |
| -5% to 5%     | Nonsmokers      | 2,499,048       | 78,385   | 0.608 (0.597–0.619) |                      |
|               | Quitters        | 147,147         | 5,338    | 0.832 (0.808–0.857) |                      |
|               | Current smokers | 810,016         | 28,673   | 1 (reference)       |                      |
| ≥5%           | Nonsmokers      | 719,131         | 19,567   | 0.661 (0.638–0.686) |                      |
|               | Quitters        | 86,469          | 2,796    | 0.912 (0.873–0.953) |                      |
|               | Current smokers | 268,726         | 7,446    | 1 (reference)       |                      |

HR, hazard ratio; CI, confidence interval.
