# Supplementary material for: Dose-Dependent Effect of Smoking on Risk of Diabetes Remains after Smoking Cessation: A Nationwide Population-Based Cohort Study in Korea
Source: PubMed Central journal article supplement — Diabetes Metab J. 2021 Mar 4;45(4):539–46. doi: 10.4093/dmj.2020.0061 (PMC8369207; doi:10.4093/dmj.2020.0061), 2021-03-04
Supplement: dmj-2020-0061-suppl3.pdf [file dmj-2020-0061-suppl3.pdf]

**Supplementary Table 3.** Adjusted HR for incident diabetes according to quitting smoking and smoking intensity

| Subgroup       | Smoking amount | No. of subjects | Diabetes  | HR (95% CI)         | P interaction       |  |
|----------------|----------------|-----------------|-----------|---------------------|---------------------|--|
| Sex            |                |                 |           |                     | <0.0001             |  |
| Male           | Nonsmokers     | 971,103         | 27,806    | 0.807 (0.768–0.848) |                     |  |
|                | Quitters       |                 |           |                     |                     |  |
|                | 0–<5           | 30,727          | 610       | 0.919 (0.838–1.008) |                     |  |
|                | 5–<14          | 87,949          | 2,007     | 0.983 (0.922–1.049) |                     |  |
|                | 14–<26         | 75,979          | 2,782     | 1.137 (1.07–1.208)  |                     |  |
|                | ≥26            | 50,365          | 3,179     | 1.332 (1.255–1.414) |                     |  |
|                | Current smoker |                 |           |                     |                     |  |
|                | 0–<5           | 88,166          | 1,700     | 1 (reference)       |                     |  |
|                | 5–<14          | 443,409         | 9,162     | 1.091 (1.036–1.149) |                     |  |
|                | 14–<26         | 422,311         | 15,097    | 1.358 (1.291–1.428) |                     |  |
|                | ≥26            | 225,952         | 13,872    | 1.591 (1.511–1.674) |                     |  |
|                | Female         | Nonsmokers      | 2,763,629 | 86,444              | 0.663 (0.597–0.737) |  |
|                |                | Quitters        |           |                     |                     |  |
|                |                | 0–<5            | 4,587     | 95                  | 0.882 (0.703–1.106) |  |
| 5–<14          |                | 2,087           | 84        | 0.931 (0.734–1.182) |                     |  |
| 14–<26         |                | 690             | 39        | 0.853 (0.613–1.188) |                     |  |
| ≥26            |                | 277             | 30        | 1.267 (0.874–1.838) |                     |  |
| Current smoker |                |                 |           |                     |                     |  |
| 0–<5           |                | 12,297          | 350       | 1 (reference)       |                     |  |
| 5–<14          |                | 12,463          | 556       | 1.077 (0.942–1.231) |                     |  |
| 14–<26         |                | 4,915           | 348       | 1.203 (1.037–1.396) |                     |  |
| ≥26            |                | 1,886           | 174       | 1.282 (1.069–1.538) |                     |  |
| Age group, yr  |                |                 |           |                     | <0.0001             |  |
| 20–39          |                | Nonsmokers      | 856,729   | 5,401               | 0.872 (0.802–0.949) |  |
|                |                | Quitters        |           |                     |                     |  |
|                | 0–<5           | 20,712          | 185       | 0.899 (0.764–1.059) |                     |  |
|                | 5–<14          | 46,763          | 545       | 0.949 (0.847–1.063) |                     |  |
|                | 14–<26         | 16,549          | 303       | 1.089 (0.95–1.25)   |                     |  |
|                | ≥26            | 1,618           | 38        | 1.089 (0.784–1.511) |                     |  |
|                | Current smoker |                 |           |                     |                     |  |
|                | 0–<5           | 65,212          | 657       | 1 (reference)       |                     |  |
|                | 5–<14          | 299,361         | 3,954     | 1.15 (1.059–1.249)  |                     |  |
|                | 14–<26         | 131,023         | 2,670     | 1.354 (1.242–1.477) |                     |  |
|                | ≥26            | 10,041          | 315       | 1.659 (1.448–1.902) |                     |  |
|                | 40–64          | Nonsmokers      | 2,261,763 | 68,691              | 0.691 (0.651–0.733) |  |
|                |                | Quitters        |           |                     |                     |  |
|                |                | 0–<5            | 13,423    | 441                 | 0.881 (0.79–0.983)  |  |
| 5–<14          |                | 40,422          | 1,359     | 0.901 (0.833–0.975) |                     |  |
| 14–<26         |                | 54,254          | 2,100     | 0.952 (0.886–1.023) |                     |  |
| ≥26            |                | 36,865          | 2,212     | 1.14 (1.061–1.224)  |                     |  |

(Continued to the next page)

Supplementary Table 3. Continued

| Subgroup            | Smoking amount      | No. of subjects | Diabetes            | HR (95% CI)         | P interaction |  |
|---------------------|---------------------|-----------------|---------------------|---------------------|---------------|--|
| ≥65                 | Current smoker      |                 |                     |                     |               |  |
|                     | 0-<5                | 32,076          | 1,164               | 1 (reference)       |               |  |
|                     | 5-<14               | 145,637         | 5,008               | 1.044 (0.98–1.113)  |               |  |
|                     | 14-<26              | 270,037         | 10,937              | 1.171 (1.102–1.244) |               |  |
|                     | ≥26                 | 179,087         | 10,608              | 1.335 (1.257–1.419) |               |  |
|                     | Nonsmokers          |                 |                     |                     |               |  |
|                     | 616,240             |                 |                     |                     |               |  |
|                     | 40,158              |                 |                     |                     |               |  |
|                     | 0.748 (0.657–0.853) |                 |                     |                     |               |  |
|                     | Quitters            |                 |                     |                     |               |  |
|                     | 0-<5                | 1,179           | 79                  | 0.899 (0.696–1.161) |               |  |
|                     | 5-<14               | 2,851           | 187                 | 0.88 (0.725–1.067)  |               |  |
|                     | 14-<26              | 5,866           | 418                 | 0.962 (0.818–1.13)  |               |  |
|                     | ≥26                 | 12,159          | 959                 | 1.073 (0.929–1.24)  |               |  |
|                     | Current smoker      |                 |                     |                     |               |  |
|                     | 0-<5                | 3,175           | 229                 | 1 (reference)       |               |  |
| 5-<14               | 10,874              | 756             | 1.017 (0.877–1.179) |                     |               |  |
| 14-<26              | 26,166              | 1,838           | 1.054 (0.919–1.21)  |                     |               |  |
| ≥26                 | 38,710              | 3,123           | 1.203 (1.051–1.376) |                     |               |  |
| Hypertension        |                     |                 |                     |                     |               |  |
| <0.0001             |                     |                 |                     |                     |               |  |
| No                  | Nonsmokers          |                 |                     |                     |               |  |
|                     | 2,794,898           |                 |                     |                     |               |  |
|                     | 54,736              |                 |                     |                     |               |  |
|                     | 0.802 (0.757–0.85)  |                 |                     |                     |               |  |
|                     | Quitters            |                 |                     |                     |               |  |
|                     | 0-<5                | 29,481          | 442                 | 0.971 (0.871–1.083) |               |  |
|                     | 5-<14               | 72,470          | 1,234               | 0.968 (0.894–1.047) |               |  |
|                     | 14-<26              | 55,502          | 1,521               | 1.142 (1.06–1.232)  |               |  |
|                     | ≥26                 | 30,791          | 1,512               | 1.409 (1.306–1.52)  |               |  |
|                     | Current smoker      |                 |                     |                     |               |  |
|                     | 0-<5                | 85,199          | 1,239               | 1 (reference)       |               |  |
|                     | 5-<14               | 386,597         | 6,279               | 1.092 (1.027–1.16)  |               |  |
|                     | 14-<26              | 335,463         | 9,261               | 1.349 (1.271–1.431) |               |  |
|                     | ≥26                 | 157,352         | 7,686               | 1.631 (1.534–1.733) |               |  |
|                     | Yes                 | Nonsmokers      |                     |                     |               |  |
|                     |                     | 939,834         |                     |                     |               |  |
| 59,514              |                     |                 |                     |                     |               |  |
| 0.791 (0.737–0.849) |                     |                 |                     |                     |               |  |
| Quitters            |                     |                 |                     |                     |               |  |
| 0-<5                |                     | 5,833           | 263                 | 0.819 (0.712–0.941) |               |  |
| 5-<14               |                     | 17,566          | 857                 | 0.895 (0.813–0.985) |               |  |
| 14-<26              |                     | 21,167          | 1,300               | 1.007 (0.923–1.1)   |               |  |
| ≥26                 |                     | 19,851          | 1,697               | 1.224 (1.125–1.332) |               |  |
| Current smoker      |                     |                 |                     |                     |               |  |
| 0-<5                |                     | 15,264          | 811                 | 1 (reference)       |               |  |
| 5-<14               |                     | 69,275          | 3,439               | 0.991 (0.918–1.07)  |               |  |
| 14-<26              |                     | 91,763          | 6,184               | 1.219 (1.133–1.312) |               |  |
| ≥26                 |                     | 70,486          | 6,360               | 1.441 (1.339–1.551) |               |  |

(Continued to the next page)

Supplementary Table 3. Continued

| Subgroup         | Smoking amount | No. of subjects | Diabetes  | HR (95% CI)         | P interaction       |  |
|------------------|----------------|-----------------|-----------|---------------------|---------------------|--|
| Dyslipidemia     |                |                 |           |                     | <0.0001             |  |
| No               | Nonsmokers     | 3,011,727       | 69,689    | 0.803 (0.761–0.847) |                     |  |
|                  | Quitters       |                 |           |                     |                     |  |
|                  | 0–<5           | 30,716          | 502       | 0.925 (0.836–1.024) |                     |  |
|                  | 5–<14          | 75,823          | 1,391     | 0.936 (0.87–1.008)  |                     |  |
|                  | 14–<26         | 60,184          | 1,832     | 1.132 (1.057–1.213) |                     |  |
|                  | ≥26            | 36,891          | 2,025     | 1.406 (1.314–1.505) |                     |  |
|                  | Current smoker |                 |           |                     |                     |  |
|                  | 0–<5           | 88,676          | 1,458     | 1 (reference)       |                     |  |
|                  | 5–<14          | 399,550         | 7,055     | 1.074 (1.015–1.136) |                     |  |
|                  | 14–<26         | 357,905         | 10,934    | 1.348 (1.276–1.424) |                     |  |
|                  | ≥26            | 181,936         | 9,731     | 1.618 (1.53–1.711)  |                     |  |
|                  | Yes            | Nonsmokers      | 723,005   | 44,561              | 0.791 (0.728–0.859) |  |
|                  |                | Quitters        |           |                     |                     |  |
|                  |                | 0–<5            | 4,598     | 203                 | 0.873 (0.744–1.024) |  |
| 5–<14            |                | 14,213          | 700       | 0.966 (0.866–1.078) |                     |  |
| 14–<26           |                | 16,485          | 989       | 1.042 (0.941–1.154) |                     |  |
| ≥26              |                | 13,751          | 1,184     | 1.239 (1.122–1.369) |                     |  |
| Current smoker   |                |                 |           |                     |                     |  |
| 0–<5             |                | 11,787          | 592       | 1 (reference)       |                     |  |
| 5–<14            |                | 56,322          | 2,663     | 1.005 (0.919–1.099) |                     |  |
| 14–<26           |                | 69,321          | 4,511     | 1.236 (1.134–1.347) |                     |  |
| ≥26              |                | 45,902          | 4,315     | 1.499 (1.375–1.634) |                     |  |
| Regular exercise |                |                 |           |                     | 0.0033              |  |
| No               |                | Nonsmokers      | 3,038,942 | 91,887              | 0.824 (0.783–0.867) |  |
|                  |                | Quitters        |           |                     |                     |  |
|                  | 0–<5           | 26,781          | 506       | 0.902 (0.816–0.997) |                     |  |
|                  | 5–<14          | 68,066          | 1,533     | 0.965 (0.9–1.035)   |                     |  |
|                  | 14–<26         | 56,895          | 2,144     | 1.185 (1.11–1.264)  |                     |  |
|                  | ≥26            | 37,859          | 2,421     | 1.393 (1.306–1.485) |                     |  |
|                  | Current smoker |                 |           |                     |                     |  |
|                  | 0–<5           | 80,463          | 1,578     | 1 (reference)       |                     |  |
|                  | 5–<14          | 376,762         | 7,861     | 1.072 (1.016–1.132) |                     |  |
|                  | 14–<26         | 353,539         | 12,543    | 1.347 (1.278–1.42)  |                     |  |
|                  | ≥26            | 188,073         | 11,466    | 1.622 (1.538–1.711) |                     |  |
|                  | Yes            | Nonsmokers      | 695,79    | 22,363              | 0.748 (0.681–0.821) |  |
|                  |                | Quitters        |           |                     |                     |  |
|                  |                | 0–<5            | 8,533     | 199                 | 0.935 (0.792–1.104) |  |
| 5–<14            |                | 21,97           | 558       | 0.931 (0.823–1.052) |                     |  |
| 14–<26           |                | 19,774          | 677       | 0.94 (0.835–1.057)  |                     |  |
| ≥26              |                | 12,783          | 788       | 1.207 (1.076–1.355) |                     |  |

(Continued to the next page)

Supplementary Table 3. Continued

| Subgroup      | Smoking amount | No. of subjects | Diabetes | HR (95% CI)         | <i>P</i> interaction |
|---------------|----------------|-----------------|----------|---------------------|----------------------|
|               | Current smoker |                 |          |                     |                      |
|               | 0–<5           | 20              | 472      | 1 (reference)       |                      |
|               | 5–<14          | 79,110          | 1,857    | 1.012(0.915–1.12)   |                      |
|               | 14–<26         | 73,687          | 2,902    | 1.279(1.16–1.409)   |                      |
|               | ≥26            | 39,765          | 2,580    | 1.51(1.367–1.667)   |                      |
| Weight change |                |                 |          |                     | <0.0001              |
| <–5%          | Nonsmokers     |                 |          |                     |                      |
|               |                | 516,553         | 16,298   | 0.713 (0.629–0.807) |                      |
|               | Quitters       |                 |          |                     |                      |
|               | 0–<5           | 2,934           | 66       | 0.884 (0.675–1.158) |                      |
|               | 5–<14          | 6,644           | 174      | 0.858 (0.708–1.04)  |                      |
|               | 14–<26         | 5,511           | 212      | 0.986 (0.822–1.182) |                      |
|               | ≥26            | 3,956           | 240      | 1.193 (1–1.423)     |                      |
| –5% to 5%     | Current smoker |                 |          |                     |                      |
|               | 0–<5           | 10,082          | 260      | 1 (reference)       |                      |
|               | 5–<14          | 41,653          | 994      | 0.931 (0.812–1.067) |                      |
|               | 14–<26         | 47,646          | 1,911    | 1.219 (1.071–1.388) |                      |
|               | ≥26            | 33,276          | 1,975    | 1.37 (1.203–1.561)  |                      |
| –5% to 5%     | Nonsmokers     |                 |          |                     |                      |
|               |                | 2,499,048       | 78,385   | 0.806 (0.762–0.852) |                      |
|               | Quitters       |                 |          |                     |                      |
|               | 0–<5           | 20,804          | 438      | 0.906 (0.813–1.01)  |                      |
|               | 5–<14          | 51,901          | 1,260    | 0.931 (0.861–1.005) |                      |
|               | 14–<26         | 45,019          | 1,728    | 1.111 (1.034–1.194) |                      |
|               | ≥26            | 29,423          | 1,912    | 1.321 (1.231–1.418) |                      |
| ≥5%           | Current smoker |                 |          |                     |                      |
|               | 0–<5           | 61,489          | 1,310    | 1 (reference)       |                      |
|               | 5–<14          | 288,906         | 6,397    | 1.071 (1.009–1.136) |                      |
|               | 14–<26         | 297,655         | 10,874   | 1.335 (1.261–1.414) |                      |
|               | ≥26            | 161,966         | 10,092   | 1.604 (1.514–1.7)   |                      |
| ≥5%           | Nonsmokers     |                 |          |                     |                      |
|               |                | 719,131         | 19,567   | 0.878 (0.8–0.965)   |                      |
|               | Quitters       |                 |          |                     |                      |
|               | 0–<5           | 11,576          | 201      | 0.957 (0.811–1.128) |                      |
|               | 5–<14          | 31,491          | 657      | 1.072 (0.953–1.206) |                      |
|               | 14–<26         | 26,139          | 881      | 1.191 (1.065–1.332) |                      |
|               | ≥26            | 17,263          | 1057     | 1.44 (1.291–1.607)  |                      |
| ≥5%           | Current smoker |                 |          |                     |                      |
|               | 0–<5           | 28,892          | 480      | 1 (reference)       |                      |
|               | 5–<14          | 125,313         | 2,327    | 1.105 (1.002–1.219) |                      |
|               | 14–<26         | 81,925          | 2,660    | 1.393 (1.263–1.535) |                      |
|               | ≥26            | 32,596          | 1,979    | 1.722 (1.556–1.906) |                      |

HR, hazard ratio; CI, confidence interval.
