# Supplementary material for: Dose-Dependent Effect of Smoking on Risk of Diabetes Remains after Smoking Cessation: A Nationwide Population-Based Cohort Study in Korea
Source: PubMed Central journal article supplement — Diabetes Metab J. 2021 Mar 4;45(4):539–46. doi: 10.4093/dmj.2020.0061 (PMC8369207; doi:10.4093/dmj.2020.0061), 2021-03-04
Supplement: dmj-2020-0061-suppl4.pdf [file dmj-2020-0061-suppl4.pdf]

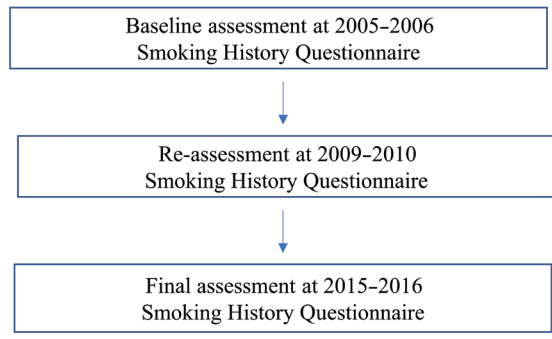

|           | Smoking status |          |          |                |                |
|-----------|----------------|----------|----------|----------------|----------------|
| year      |                |          |          |                |                |
| 2005-2006 | Never          | Quit     | Smoke    | Quit           | Smoke          |
| 2009-2010 | Never          | Quit     | Quit     | Smoke          | Smoke          |
| 2015-2016 | Nonsmoker      | Quitters | Quitters | Current smoker | Current smoker |

Supplementary Fig. 1. Study design.
